# Supplementary material for: Acetyl nitrate nitrations in [bmpy][N(Tf)2] and [bmpy][OTf], and the recycling of ionic liquids
Source: Royal Society of Chemistry journal article supplement (doi:10.1039/b417152g), 2005-01-01
Supplement: b417152g.pdf [file b417152g.pdf]

## Acetyl nitrate nitrations in [bmpy][N(Tf)<sub>2</sub>] and [bmpy][OTf], and the recycling of ionic liquids

Emilie Dal and N. Llewellyn Lancaster\*

Department of Chemistry, King's College London, Strand, London, WC2R 2LS, UK; E-mail: llewellyn.lancaster@kcl.ac.uk

### Kinetic data

All reactions were performed at 25 °C under a nitrogen atmosphere. Graphs of concentration against time were plotted, and from these, the initial rate of reaction ( $V_0$ ) was estimated. These data are reported below for the nitration of toluene in dichloromethane where  $[\text{Ac}_2\text{O}]_0$  was held constant (table S1) and where  $[\text{HNO}_3]_0$  was held constant (table S2).

Likewise, data are reported for the nitration of chlorobenzene in [bmpy][N(Tf)<sub>2</sub>] where  $[\text{Ac}_2\text{O}]_0$  was held constant (table S3) and where  $[\text{HNO}_3]_0$  was held constant (table S4).

By plotting  $\log_{10} V_0$  against  $\log_{10} [\text{X}]_0$ , it is possible to estimate the order of reaction with respect to [X]. This has been done, and is reported in each table.

**Table S1** Nitration of toluene in CH<sub>2</sub>Cl<sub>2</sub> with varied  $[\text{HNO}_3]_0$ ;  $[\text{Ac}_2\text{O}]_0$  ca. 0.84 M.

| $[\text{HNO}_3]_0 / \text{M}$ | $V_0 / \text{M min}^{-1}$ | Approx. order wrt $[\text{HNO}_3]_0$ |
|-------------------------------|---------------------------|--------------------------------------|
| 0.39                          | 0.05                      | 3                                    |
| 0.44                          | 0.06                      |                                      |
| 0.65                          | 0.25                      |                                      |

**Table S2** Nitration of toluene in CH<sub>2</sub>Cl<sub>2</sub> with varied  $[\text{Ac}_2\text{O}]_0$ ;  $[\text{HNO}_3]_0$  ca. 0.43 M.

| $[\text{Ac}_2\text{O}]_0 / \text{M}$ | $V_0 / \text{M min}^{-1}$ | Approx. order wrt $[\text{Ac}_2\text{O}]_0$ |
|--------------------------------------|---------------------------|---------------------------------------------|
| 0.56                                 | 0.012                     | 3                                           |
| 0.88                                 | 0.060                     |                                             |
| 1.0                                  | 0.070                     |                                             |

**Table S3** Nitration of chlorobenzene in [bmpy][N(Tf)<sub>2</sub>] with varied  $[\text{HNO}_3]_0$ ;  $[\text{Ac}_2\text{O}]_0$  ca. 0.82 M.

| $[\text{HNO}_3]_0 / \text{M}$ | $V_0 / \text{M min}^{-1}$ | Approx. order wrt $[\text{HNO}_3]_0$ |
|-------------------------------|---------------------------|--------------------------------------|
| 0.43                          | 0.067                     | 2                                    |
| 0.48                          | 0.083                     |                                      |
| 0.49                          | 0.083                     |                                      |
| 0.67                          | 0.17                      |                                      |

**Table S4** Nitration of chlorobenzene in [bmpy][N(Tf)<sub>2</sub>] with varied [Ac<sub>2</sub>O]<sub>0</sub>; [HNO<sub>3</sub>]<sub>0</sub> *ca.* 0.56 M.

| [Ac <sub>2</sub> O] <sub>0</sub> / M | <i>V</i> <sub>0</sub> / M min <sup>-1</sup> | Approx. order wrt [Ac <sub>2</sub> O] <sub>0</sub> |
|--------------------------------------|---------------------------------------------|----------------------------------------------------|
| 0.67                                 | 0.011                                       |                                                    |
| 0.74                                 | 0.020                                       | 5 or higher                                        |
| 1.0                                  | 0.10                                        |                                                    |
